# Supplementary material
Source: PubMed Central journal article supplement (PMC7483295)
Supplement: NIHMS1583665-supplement-316053_Online.pdf [file NIHMS1583665-supplement-316053_Online.pdf]

## Supplemental Material

Online Table I: Systemic hemodynamics in lowlanders at sea level and high altitude.

|                                   |              | Control     |               |               |                | Blockade                  |                             |                             |                             |
|-----------------------------------|--------------|-------------|---------------|---------------|----------------|---------------------------|-----------------------------|-----------------------------|-----------------------------|
|                                   |              | Rest        | SNP1          | SNP2          | SNP3           | Rest                      | SNP1                        | SNP2                        | SNP3                        |
| <b>LL</b><br><b>Sea level</b>     | <i>Vel.</i>  | 6.6 ± 2.3   | 19.8 ± 4.4*   | 22.3 ± 5.9*   | 27.3 ± 6.4*    | 20.1 ± 7.3 <sup>†</sup>   | 34.9 ± 12.8 <sup>†*</sup>   | 38.3 ± 10.3 <sup>†*</sup>   | 46.1 ± 10.2 <sup>†*</sup>   |
|                                   | <i>Dia.</i>  | 0.35 ± 0.03 | 0.37 ± 0.03*  | 0.37 ± 0.02*  | 0.38 ± 0.02*   | 0.37 ± 0.03 <sup>†</sup>  | 0.38 ± 0.03 <sup>†*</sup>   | 0.39 ± 0.02 <sup>†*</sup>   | 0.41 ± 0.03 <sup>†*</sup>   |
|                                   | <i>MBF</i>   | 38.9 ± 13.7 | 125.6 ± 34.1* | 142.9 ± 38.5* | 188.0 ± 46.8*  | 125.4 ± 40.7 <sup>†</sup> | 239.3 ± 84.6 <sup>†*</sup>  | 275.0 ± 81.3 <sup>†*</sup>  | 359.8 ± 85.2 <sup>†*</sup>  |
|                                   | <i>Cond.</i> | 43.4 ± 13.8 | 147.5 ± 44.7* | 169.7 ± 49.1* | 233.3 ± 66.0*  | 141.3 ± 51.4 <sup>†</sup> | 276.7 ± 108.4 <sup>†*</sup> | 324.2 ± 103.6 <sup>†*</sup> | 442.6 ± 109.8 <sup>†*</sup> |
| <b>LL</b><br><b>High altitude</b> | <i>Vel.</i>  | 5.58 ± 2.5  | 14.1 ± 7.9*   | 23.2 ± 5.4*   | 28.5 ± 7.4 *   | 20.2 ± 7.7 <sup>†</sup>   | 34.0 ± 9.5 <sup>†*</sup>    | 40.3 ± 6.9 <sup>†*</sup>    | 46.8 ± 9.3 <sup>†*</sup>    |
|                                   | <i>Dia.</i>  | 0.33 ± 0.03 | 0.35 ± 0.03*  | 0.36 ± 0.02*  | 0.39 ± 0.03*   | 0.36 ± 0.03 <sup>†</sup>  | 0.37 ± 0.02 <sup>†*</sup>   | 0.39 ± 0.02 <sup>†*</sup>   | 0.41 ± 0.02 <sup>†*</sup>   |
|                                   | <i>MBF</i>   | 38.7 ± 11.8 | 83.2 ± 45.6*  | 144.0 ± 41.4* | 201.1 ± 60.2*  | 126.4 ± 58.8 <sup>†</sup> | 226.1 ± 67.9 <sup>†*</sup>  | 293.2 ± 51.8 <sup>†*</sup>  | 365.9 ± 73.7 <sup>†*</sup>  |
|                                   | <i>Cond.</i> | 30.8 ± 13.1 | 93.6 ± 52.4*  | 160.3 ± 45.2* | 231.2 ± 72.3*  | 143.7 ± 78.7 <sup>†</sup> | 251.0 ± 94.8 <sup>†*</sup>  | 324.0 ± 75.5 <sup>†*</sup>  | 408.1 ± 114.7 <sup>†*</sup> |
|                                   |              | Rest        | ACH1          | ACH2          | ACH3           | Rest                      | ACH1                        | ACH2                        | ACH3                        |
| <b>LL</b><br><b>Sea level</b>     | <i>Vel.</i>  | 6.2 ± 2.6   | 19.2 ± 5.4*   | 23.8 ± 12.0*  | 34.6 ± 14.9*   | 19.6 ± 6.7 <sup>†</sup>   | 32.1 ± 10.3 <sup>†*</sup>   | 38.0 ± 15.2 <sup>†*</sup>   | 45.3 ± 18.0 <sup>†*</sup>   |
|                                   | <i>Dia.</i>  | 0.36 ± 0.03 | 0.37 ± 0.03   | 0.37 ± 0.03   | 0.38 ± 0.03*   | 0.36 ± 0.02               | 0.37 ± 0.03                 | 0.37 ± 0.04                 | 0.39 ± 0.04*                |
|                                   | <i>MBF</i>   | 38.2 ± 17.7 | 127.6 ± 57.1* | 156.0 ± 93.2* | 247.6 ± 132.2* | 116.3 ± 35.5 <sup>†</sup> | 209.6 ± 92.4 <sup>†*</sup>  | 263.7 ± 160.1 <sup>†*</sup> | 339.1 ± 169.6 <sup>†*</sup> |
|                                   | <i>Cond.</i> | 42.6 ± 18.1 | 145.4 ± 56.8* | 173.1 ± 89.8* | 276.4 ± 125.7* | 132.7 ± 46.0 <sup>†</sup> | 240.2 ± 97.8 <sup>†*</sup>  | 301.0 ± 167.5 <sup>†*</sup> | 390.5 ± 185.7 <sup>†*</sup> |
| <b>LL</b><br><b>High altitude</b> | <i>Vel.</i>  | 4.5 ± 1.7   | 10.2 ± 4.2*   | 17.1 ± 5.7*   | 21.0 ± 7.2*    | 20.7 ± 6.9 <sup>†</sup>   | 32.4 ± 9.8 <sup>†*</sup>    | 36.8 ± 9.1 <sup>†*</sup>    | 46.4 ± 9.5 <sup>†*</sup>    |
|                                   | <i>Dia.</i>  | 0.35 ± 0.03 | 0.35 ± 0.03   | 0.36 ± 0.03   | 0.37 ± 0.03*   | 0.36 ± 0.03               | 0.37 ± 0.03 <sup>†</sup>    | 0.38 ± 0.03 <sup>†*</sup>   | 0.40 ± 0.03 <sup>†*</sup>   |
|                                   | <i>MBF</i>   | 24.5 ± 6.4  | 59.5 ± 23.8   | 102.2 ± 35.8* | 137.5 ± 54.0*  | 124.2 ± 45.1 <sup>†</sup> | 209.0 ± 78.2 <sup>†*</sup>  | 247.9 ± 60.4 <sup>†*</sup>  | 347.6 ± 68.0 <sup>†*</sup>  |
|                                   | <i>Cond.</i> | 26.2 ± 7.0  | 65.9 ± 33.2   | 113.6 ± 47.3* | 157.1 ± 73.5*  | 141.8 ± 68.6 <sup>†</sup> | 245.0 ± 127.4 <sup>†*</sup> | 274.3 ± 81.9 <sup>†*</sup>  | 401.3 ± 124.4 <sup>†*</sup> |

*List of Abbreviations:* ACH, acetylcholine; Cond., absolute forearm vascular conductance; Dia, brachial artery diameter; LL, lowlander; MBF, brachial artery mean blood flow; SNP, sodium nitroprusside. \*P<0.05, vs Rest. <sup>†</sup>P<0.05, vs control.

Online Table II: Systemic hemodynamics in highlanders

|               |              | Control     |                |                |                | Blockade      |                 |                 |                 |
|---------------|--------------|-------------|----------------|----------------|----------------|---------------|-----------------|-----------------|-----------------|
|               |              | Rest        | SNP1           | SNP2           | SNP3           | Rest          | SNP1            | SNP2            | SNP3            |
| <b>EE</b>     | <i>Vel.</i>  | 8.6 ± 2.8   | 22.8 ± 11.8*   | 26.7 ± 10.2*   | 25.7 ± 7.7*    | 15.9 ± 3.8†   | 34.0 ± 9.2†*    | 33.1 ± 5.2†*    | 33.7 ± 4.9†*    |
|               | <i>Dia.</i>  | 0.42 ± 0.07 | 0.45 ± 0.09*   | 0.48 ± 0.09*   | 0.51 ± 0.10*   | 0.43 ± 0.06†  | 0.48 ± 0.07†*   | 0.51 ± 0.07†*   | 0.52 ± 0.09†*   |
|               | <i>MBF</i>   | 67.9 ± 17.0 | 230.9 ± 161.0* | 294.1 ± 147.6* | 324.8 ± 158.0* | 139.7 ± 41.6† | 383.5 ± 166.7†* | 411.7 ± 131.3†* | 437.3 ± 135.6†* |
|               | <i>Cond.</i> | 74.5 ± 19.2 | 268.2 ± 195.9* | 354.4 ± 176.7* | 425.3 ± 207.4* | 161.9 ± 53.1  | 458.9 ± 188.5†* | 491.7 ± 150.8†* | 531.5 ± 170.3†* |
| <b>Non-EE</b> | <i>Vel.</i>  | 6.8 ± 3.1   | 22.9 ± 8.8*    | 24.9 ± 10.3*   | 27.2 ± 7.9*    | 19.4 ± 7.9†   | 40.6 ± 16.2†*   | 43.7 ± 14.9†*   | 44.5 ± 17.2†*   |
|               | <i>Dia.</i>  | 0.36 ± 0.04 | 0.38 ± 0.03*   | 0.43 ± 0.03*   | 0.44 ± 0.03*   | 0.36 ± 0.03   | 0.39 ± 0.04*    | 0.44 ± 0.04*    | 0.45 ± 0.04*    |
|               | <i>MBF</i>   | 42.5 ± 17.8 | 158.9 ± 65.8*  | 210.0 ± 78.5*  | 249.9 ± 67.0*  | 121.6 ± 54.8  | 299.0 ± 153.7†* | 395.6 ± 149.6†* | 419.8 ± 165.3†* |
|               | <i>Cond.</i> | 43.9 ± 16.6 | 172.5 ± 64.1*  | 235.8 ± 74.9*  | 292.4 ± 76.3*  | 123.7 ± 48.6  | 320.4 ± 141.8†* | 442.7 ± 139.4†* | 490.9 ± 166.5†* |
|               |              | Rest        | ACH1           | ACH2           | ACH3           | Rest          | ACH1            | ACH2            | ACH3            |
| <b>EE</b>     | <i>Vel.</i>  | 6.6 ± 2.9   | 9.8 ± 3.5      | 10.5 ± 3.3*    | 12.4 ± 4.6*    | 17.6 ± 6.9†   | 20.2 ± 4.2†     | 21.3 ± 7.5†*    | 25.3 ± 9.6†*    |
|               | <i>Dia.</i>  | 0.44 ± 0.07 | 0.43 ± 0.08    | 0.44 ± 0.07    | 0.44 ± 0.07    | 0.45 ± 0.09   | 0.45 ± 0.07     | 0.45 ± 0.07     | 0.46 ± 0.07     |
|               | <i>MBF</i>   | 55.0 ± 13.2 | 80.9 ± 17.6    | 87.5 ± 16.0*   | 101.6 ± 24.3*  | 155.8 ± 48.6† | 187.0 ± 42.4†   | 193.2 ± 61.2†*  | 241.0 ± 73.3†*  |
|               | <i>Cond.</i> | 60.1 ± 14.0 | 89.2 ± 19.3    | 95.4 ± 17.1*   | 112.9 ± 26.5*  | 183.4 ± 67.8† | 210.7 ± 46.8†   | 220.2 ± 65.4†*  | 273.9 ± 81.0†*  |
| <b>Non-EE</b> | <i>Vel.</i>  | 7.1 ± 3.9   | 13.0 ± 8.4*    | 16.5 ± 8.2*    | 22.5 ± 9.5*    | 20.5 ± 8.7†   | 26.9 ± 14.1†*   | 32.2 ± 14.3†*   | 40.2 ± 21.2†*   |
|               | <i>Dia.</i>  | 0.38 ± 0.04 | 0.39 ± 0.04    | 0.40 ± 0.03*   | 0.40 ± 0.03*   | 0.38 ± 0.05   | 0.38 ± 0.05     | 0.39 ± 0.04*    | 0.41 ± 0.04*    |
|               | <i>MBF</i>   | 47.2 ± 23.5 | 88.9 ± 48.2    | 122.1 ± 59.7*  | 168.5 ± 67.7*  | 139.2 ± 64.8† | 185.2 ± 104.2†  | 239.6 ± 125.1†* | 322.5 ± 180.2†* |
|               | <i>Cond.</i> | 48.7 ± 23.1 | 94.2 ± 46.9    | 126.8 ± 56.3*  | 177.8 ± 65.5*  | 140.1 ± 56.0† | 187.2 ± 91.4†   | 244.0 ± 109.1†* | 323.7 ± 156.8†* |

List of Abbreviations: List of Abbreviations: ACH, acetylcholine; Cond., absolute forearm vascular conductance; Dia, brachial artery diameter; EE, Excessive erythrocytosis; MBF, brachial artery mean blood flow; SNP, sodium nitroprusside. \*P<0.05, vs Rest. †P<0.05, vs control.
